# Supplementary material
Source: Frontiers journal article supplement (https://www.frontiersin.org/articles/495777)
Supplement: Data_Sheet_1.pdf [file Data_Sheet_1.pdf]

## Supplementary Material

**Table S1.** Names and classifications of the essential metabolites with altered levels between wild-type and tmRNA deletion strain of *A. veronii* C4

| Name of the metabolites   | Classification of the metabolites         |
|---------------------------|-------------------------------------------|
| Uracil                    | Diazines                                  |
| 4-Guanidinobutyric acid   | Organic acids and derivatives             |
| L-Iditol                  | Organic oxygen compounds                  |
| Diacetyl                  | unknown                                   |
| L-Glutamate               | Carboxylic acids and derivatives          |
| (+)-Mevalonolactone       | unknown                                   |
| Ethylmalonic acid         | Lipids and lipid-like molecules           |
| Triethanolamine           | Amines                                    |
| 2-Hydroxyadenine          | Organoheterocyclic compounds              |
| Xanthine                  | Organoheterocyclic compounds              |
| Lavandulol                | unknown                                   |
| Isocaproic acid           | Fatty Acyls                               |
| DL-Norvaline              | unknown                                   |
| Succinic acid             | unknown                                   |
| Hippuric acid             | Benzene and substituted derivatives       |
| Pyruvaldehyde             | Organooxygen compounds                    |
| Butyl lactate             | Carboxylic acids and derivatives          |
| Nicotinate                | Pyridines and derivatives                 |
| D-Mannitol                | Carbohydrates and carbohydrate conjugates |
| D-Sorbitol                | Organic oxygen compounds                  |
| Citramalic acid           | Fatty Acyls                               |
| L-Phenylalanine           | Organic acids and derivatives             |
| (R)-3-Hydroxybutyric acid | Organic acids and derivatives             |

|                                          |                                     |
|------------------------------------------|-------------------------------------|
| L-Norleucine                             | Organic acids and derivatives       |
| L-Arginine                               | Carboxylic acids and derivatives    |
| Ethyl 3-hydroxybutyrate                  | unknown                             |
| L-Citrulline                             | Organic acids and derivatives       |
| N-Methyl-1-deoxynojirimycin              | Piperidines?                        |
| Dulcin                                   | unknown                             |
| 2-Phenylbutyric acid                     | Benzene and substituted derivatives |
| 4-Hydroxybenzaldehyde                    | unknown                             |
| N-Acetyl-D-glucosamine                   | Organic oxygen compounds            |
| Val-Ala                                  | unknown                             |
| L-Methionine                             | Organic acids and derivatives       |
| 5-Hydroxyindoleacetate                   | Indoles and derivatives             |
| cis-4-Hydroxy-D-proline                  | Organic acids and derivatives       |
| Pectin (Galacturonic acid)               | Organic oxygen compounds            |
| Agmatine                                 | Organic nitrogen compounds          |
| Glycerol 3-phosphate                     | Lipids and lipid-like molecules     |
| Dopamine                                 | Phenols                             |
| .beta.-Citronellol                       | unknown                             |
| p-CHLOROPHENYLALANINE                    | unknown                             |
| N-Tigloylglycine                         | unknown                             |
| 3-Hydroxybenzoate                        | unknown                             |
| 2-Hydroxy-3-methoxybenzoic acid          | unknown                             |
| DL-Phenylalanine                         | Organic acids and derivatives       |
| N-Acetyl-L-methionine                    | Organic acids and derivatives       |
| 2,2-Dimethyl Succinic acid               | unknown                             |
| Jasmine lactone                          | Organoheterocyclic compounds        |
| Val-Glu                                  | Organic acids and derivatives       |
| (R)-(+)-Citronellic acid                 | Prenol lipids                       |
| Leu-Val                                  | unknown                             |
| N-Carboxyethyl-.gamma.-aminobutyric acid | unknown                             |
| Pro-Val                                  | unknown                             |

|                                   |                                  |
|-----------------------------------|----------------------------------|
| sn-Glycerol 3-phosphoethanolamine | Lipids and lipid-like molecules  |
| N-.alpha.-Acetyl-L-arginine       | unknown                          |
| Val-Val                           | unknown                          |
| Ser-Leu                           | unknown                          |
| Dodecanoic acid                   | Fatty Acyls                      |
| Ala-Glu                           | unknown                          |
| Val-Thr                           | unknown                          |
| Pantothenate                      | Carboxylic acids and derivatives |
| Pyrantel                          | unknown                          |
| 4-Aminobutyric acid               | Organic acids and derivatives    |
| Isovalerylglycine                 | Organic acids and derivatives    |
| Dimethyl sulfone                  | Sulfonyls                        |
| Nitrotyrosine                     | unknown                          |
| Pro-Ala                           | unknown                          |
| 2-Amino-2-methyl-1,3-propanediol  | unknown                          |
| Leu-Asp                           | unknown                          |
| Val-Ile                           | unknown                          |
| Ile-Thr                           | unknown                          |
| Glu-Ser                           | unknown                          |
| Arg-Val                           | unknown                          |
| Bupropion                         | Organooxygen compounds           |
| L-Tryptophan                      | Organoheterocyclic compounds     |
| Lumichrome                        | unknown                          |
| 3-Methoxytyramine                 | Benzenoids                       |
| Cytidine                          | unknown                          |
| Uridine                           | Pyrimidine nucleosides           |
| Pro-Glu                           | unknown                          |
| Pinacidil                         | unknown                          |
| Ile-Ile                           | unknown                          |
| Ile-Asn                           | unknown                          |
| Ser-Val                           | unknown                          |
| Arg-Ala                           | unknown                          |
| Myristic acid                     | Fatty Acyls                      |
| gamma-L-Glutamyl-L-valine         | Organic acids and derivatives    |
| Pro-Asn                           | unknown                          |

|                                     |                                          |
|-------------------------------------|------------------------------------------|
| Oleic acid                          | unknown                                  |
| Val-Met                             | unknown                                  |
| Deoxyadenosine                      | Nucleosides, nucleotides, and<br>alogues |
| L-NG-Monomethylarginine             | unknown                                  |
| 5-Aminopentanoic acid               | Organic acids and derivatives            |
| N-Acetyl-L-glutamate                | Organic acids and derivatives            |
| Deoxyinosine                        | Nucleosides, nucleotides, and<br>alogues |
| Deoxyinosine                        | Nucleosides, nucleotides, and<br>alogues |
| 5-Amino-4-carbamoylimidazole (AICA) | Organoheterocyclic compounds             |
| 3-Hydroxyisovaleric acid            | Lipids and lipid-like molecules          |
| Primidone                           |                                          |
| Glycerophosphocholine               | Lipids and lipid-like molecules          |
| L-Pyroglutamic acid                 | Organic acids and derivatives            |
| 1-Methylpseudouridine               | unknown                                  |
| Ribothymidine                       | Nucleosides, nucleotides, and<br>alogues |
| Primaquine                          | unknown                                  |
| Ile-Glu                             | unknown                                  |
| Ile-Ser                             | unknown                                  |
| Pentadecanoic Acid                  | Lipids and lipid-like molecules          |
| Ser-Asp                             | unknown                                  |
| Ile-Met                             | unknown                                  |
| L-Asparagine                        | Organic acids and derivatives            |
| Val-Phe                             | unknown                                  |
| trans-Vaccenic acid                 | Lipids and lipid-like molecules          |
| NG,NG-dimethyl-L-arginine(ADMA)     | unknown                                  |
| Oxprenolol                          | unknown                                  |
| Adenosine                           | Purine nucleosides                       |
| Inosine                             | Nucleosides, nucleotides, and<br>alogues |

|                                      |                                           |
|--------------------------------------|-------------------------------------------|
| Acetylcarnitine                      | unknown                                   |
| Deoxycytidine                        | Nucleosides, nucleotides, and alogues     |
| 5,2'-O-dimethylcytidine              | unknown                                   |
| beta-Estradiol                       | Steroids and steroid derivatives          |
| 5.alpha.-Androstan-17.beta.-ol-3-one | unknown                                   |
| Lamivudine                           | unknown                                   |
| Val-Arg                              | unknown                                   |
| Palmitic acid                        | Fatty Acyls                               |
| Ser-Gln                              | unknown                                   |
| Kinetin                              | unknown                                   |
| Saccharopine                         | unknown                                   |
| Ile-Tyr                              | unknown                                   |
| N,N-Dimethylaniline                  | Organic nitrogen compounds                |
| 1-Methyladenosine                    | Purine nucleosides                        |
| 3-Ureidopropionate                   | unknown                                   |
| Hydroxyisocaproic acid               | Lipids and lipid-like molecules           |
| Pelletierine                         | unknown                                   |
| Guanosine                            | Nucleosides, nucleotides, and alogues     |
| His-Glu                              | unknown                                   |
| Glycerol 1-myristate                 | unknown                                   |
| Ile-Arg                              | unknown                                   |
| Heptadecanoic acid                   | Lipids and lipid-like molecules           |
| D-Ribulose 5-phosphate               | Carbohydrates and carbohydrate conjugates |
| D-Ribulose 5-phosphate               | Carbohydrates and carbohydrate conjugates |
| His-Val                              | unknown                                   |
| L-Glutamine                          | Organic acids and derivatives             |
| Securinine                           | unknown                                   |
| Stearidonic Acid                     | unknown                                   |
| Phe-Glu                              | unknown                                   |
| alpha-Linolenic acid                 | Fatty Acyls                               |

|                                           |                                       |
|-------------------------------------------|---------------------------------------|
| S-Methyl-5'-thioadenosine                 | Nucleosides, nucleotides, and alogues |
| Linoleic acid                             | unknown                               |
| (Z)-6-Octadecenoic acid                   | unknown                               |
| Dehydroabiatic acid                       | unknown                               |
| Stearic acid                              | Fatty Acyls                           |
| Ser-Arg                                   | unknown                               |
| Arg-Gln                                   | unknown                               |
| Arg-Glu                                   | unknown                               |
| D-Glucose 6-phosphate                     | Organic oxygen compounds              |
| Isopentenyl pyrophosphate                 | Lipids and lipid-like molecules       |
| Triadimefon                               | unknown                               |
| Methoprene (S)                            | unknown                               |
| Tyr-Met                                   | unknown                               |
| 2'-Deoxyadenosine 5'-monophosphate (dAMP) | Nucleosides, nucleotides, and alogues |
| Tyr-Asp                                   | unknown                               |
| Leu-Trp                                   | unknown                               |
| Tyr-Ala                                   | unknown                               |
| His-Tyr                                   | unknown                               |
| 1-methylguanosine                         | Nucleosides, nucleotides, and alogues |
| Phe-Arg                                   | unknown                               |
| D-Fructose 1,6-bisphosphate               | Organic oxygen compounds              |
| Cytidine 5'-monophosphate                 | unknown                               |
| Uridine 5'-monophosphate (UMP)            | Nucleosides, nucleotides, and alogues |
| 3-Methoxy-4-Hydroxyphenylglycol Sulfate   | Benzenoids                            |
| N,N-Dimethylsphingosine                   | Organic nitrogen compounds            |
| 2'-Deoxyinosine                           | unknown                               |
| Phe-Tyr                                   | unknown                               |
| Adenosine 2',3'-cyclic monophosphate      | unknown                               |
| Desipramine                               | Organoheterocyclic compounds          |

|                                         |                                           |
|-----------------------------------------|-------------------------------------------|
| Arg-Asp                                 | unknown                                   |
| Tyr-Ser                                 | unknown                                   |
| Argininosuccinic acid                   | Organic acids and derivatives             |
| Erucamide                               | unknown                                   |
| Tyr-Val                                 | unknown                                   |
| 2'-O-methyladenosine                    | Nucleosides, nucleotides, and alogues     |
| Phe-Asn                                 | unknown                                   |
| Stearamide                              | Fatty Acyls                               |
| 3',5'-Cyclic guanosine monophosphate    | unknown                                   |
| Pantoprazole                            | unknown                                   |
| Adenosine 3'-monophosphate              | Nucleosides, nucleotides, and alogues     |
| 1-Palmitoylglycerol                     | unknown                                   |
| Inosine 5'-monophosphate (IMP)          | Nucleosides, nucleotides, and alogues     |
| Adenosine 3',5'-cyclic phosphate (cAMP) | unknown                                   |
| Homogentisic acid                       | Benzenoids                                |
| Behenic acid                            | Fatty Acyls                               |
| Isomaltose                              | Carbohydrates and carbohydrate conjugates |
| Cellobiose                              | unknown                                   |
| Ala-Pro                                 | unknown                                   |
| Ile-Trp                                 | unknown                                   |
| 24,25-Hydroxyvitamin D3                 | unknown                                   |
| Dihydrotachysterol                      | Steroids and steroid derivatives          |
| Arg-Trp                                 | unknown                                   |
| Cytidine 5'-diphosphate (CDP)           | Nucleosides, nucleotides, and alogues     |
| Ala-Thr                                 | unknown                                   |
| Uridine 5'-diphosphate (UDP)            | Nucleosides, nucleotides, and alogues     |
| Thiamine monophosphate                  | Organoheterocyclic compounds              |
| Normetanephine                          | unknown                                   |
| Cholecalciferol (Vitamin D3)            | unknown                                   |

|                                                        |                                           |
|--------------------------------------------------------|-------------------------------------------|
| Lathosterol                                            | unknown                                   |
| Adenosine 3',5'-diphosphate (PAP)                      | Nucleosides, nucleotides, and alogues     |
| alpha-Guanidinoglutaric Acid                           | unknown                                   |
| (-)-Tylocrebrine                                       | unknown                                   |
| Guanosine 5'-diphosphate (GDP)                         | Nucleosides, nucleotides, and alogues     |
| 1-Palmitoyl-2-hydroxy-sn-glycero-3-phosphoethanolamine | unknown                                   |
| Terfenadine                                            | unknown                                   |
| Taurolithocholic acid                                  | unknown                                   |
| cis-9-Palmitoleic acid                                 | Lipids and lipid-like molecules           |
| Vitamin K1                                             | Lipids and lipid-like molecules           |
| Gln-Asn                                                | unknown                                   |
| Maltotriose                                            | Carbohydrates and carbohydrate conjugates |
| Testosterone                                           | Steroids and steroid derivatives          |
| Cytidine 2',3'-cyclic phosphate                        | Nucleosides, nucleotides, and alogues     |
| Stachyose                                              | Organic oxygen compounds                  |
| Glycogen                                               | Organic oxygen compounds                  |
| Acetyl coenzyme A (Acetyl-CoA)                         | unknown                                   |
|                                                        |                                           |



**Table S2.** KEGG pathway affiliation for the essential metabolites with altered levels between wild-type and tmRNA deletion strain of *A. veronii* C4.

| Pathway                                      | KEGG COMPOUND database ID for the affiliated metabolites                                                                                                                              |
|----------------------------------------------|---------------------------------------------------------------------------------------------------------------------------------------------------------------------------------------|
| Metabolic pathways                           | C00106;C00042;C10164;C00178;C00259;C00262;C00385;C00794;C00079;C01089;C00327;C00140;C00093;C00475;C00299;C06424;C00559;C00624;C00294;C00387;C06427;C00092;C00354;C00130;C00544;C00112 |
| Purine metabolism                            | C00262;C00385;C00559;C00294;C00387;C00942;C01367;C00130;C00575;C00054                                                                                                                 |
| Biosynthesis of secondary metabolites        | C00042;C00483;C00385;C00079;C00327;C00093;C00624;C06427;C00354;C00130                                                                                                                 |
| Biosynthesis of antibiotics                  | C00042;C00079;C00327;C00624;C00092;C00354;C00130                                                                                                                                      |
| Pyrimidine metabolism                        | C00106;C02376;C00178;C00475;C00299;C00112                                                                                                                                             |
| ABC transporters                             | C00259;C00392;C00794;C00079;C00140;C00093                                                                                                                                             |
| Microbial metabolism in diverse environments | C00042;C05629;C00385;C00354;C00544                                                                                                                                                    |
| Biosynthesis of unsaturated fatty acids      | C00712;C06427;C01530;C08281                                                                                                                                                           |
| Phosphotransferase system (PTS)              | C00392;C00794;C00140;C00092                                                                                                                                                           |
| Fatty acid biosynthesis                      | C06424;C00712;C01530                                                                                                                                                                  |
| Tyrosine metabolism                          | C00042;C00483;C00544                                                                                                                                                                  |
| Phenylalanine metabolism                     | C00042;C05629;C00079                                                                                                                                                                  |
| Butanoate metabolism                         | C00042;C00741;C01089                                                                                                                                                                  |
| Biosynthesis of amino acids                  | C00079;C00327;C00624                                                                                                                                                                  |
| Fructose and mannose metabolism              | C00392;C00794                                                                                                                                                                         |
| Ascorbate and aldarate metabolism            | C01620;C00259                                                                                                                                                                         |
| Arginine biosynthesis                        | C00327;C00624                                                                                                                                                                         |

|                                                     |               |
|-----------------------------------------------------|---------------|
| Phenylalanine, tyrosine and tryptophan biosynthesis | C00079;C00354 |
| Amino sugar and nucleotide sugar metabolism         | C00259;C00140 |
| Methane metabolism                                  | C00483;C00354 |
| Pantothenate and CoA biosynthesis                   | C00106;C00054 |
| Sulfur metabolism                                   | C00042;C00054 |
| Carbon metabolism                                   | C00042;C00354 |
| 2-Oxocarboxylic acid metabolism                     | C00079;C00624 |
| Degradation of aromatic compounds                   | C00042;C05629 |

**Table S3.** KEGG pathway affiliation for the essential metabolites with significantly altered levels between wild-type and tmRNA deletion strain of *A. veronii* C4.

| Pathway                                 | KEGG COMPOUND database ID for the significant differential metabolites |
|-----------------------------------------|------------------------------------------------------------------------|
| Purine metabolism                       | C00130; C00559; C00294; C00385; C00387; C00262; C00575; C01367; C00942 |
| Pyrimidine metabolism                   | C00299; C00112; C00475; C02376; C00106; C00178                         |
| Tyrosine metabolism                     | C00483; C00042                                                         |
| Phenylalanine metabolism                | C05629; C00042; C00079                                                 |
| Biosynthesis of unsaturated fatty acids | C01530                                                                 |
| alpha-Linolenic acid metabolism         | C06427                                                                 |
| Streptomycin biosynthesis               | C00092                                                                 |
| Benzoate degradation via CoA ligation   | C00042                                                                 |

|                                                     |                |
|-----------------------------------------------------|----------------|
| Fructose and mannose metabolism                     | C00392; C00794 |
| Glycerolipid metabolism                             | C00093         |
| Arginine and proline metabolism                     | C00327; C00624 |
| Alanine, aspartate and glutamate metabolism         | C00042         |
| Butanoate metabolism                                | C00042         |
| Citrate cycle (TCA cycle)                           | C00042         |
| Propanoate metabolism                               | C00042         |
| Phenylalanine, tyrosine and tryptophan biosynthesis | C00079         |
| Glycerophospholipid metabolism                      | C00093         |
| Glyoxylate and dicarboxylate metabolism             | C00042         |
| Starch and sucrose metabolism                       | C00092         |
| Pentose and glucuronate interconversions            | C00259         |
| Galactose metabolism                                | C00794         |
| Amino sugar and nucleotide sugar metabolism         | C00140         |
| Aminoacyl-tRNA biosynthesis                         | C00079         |

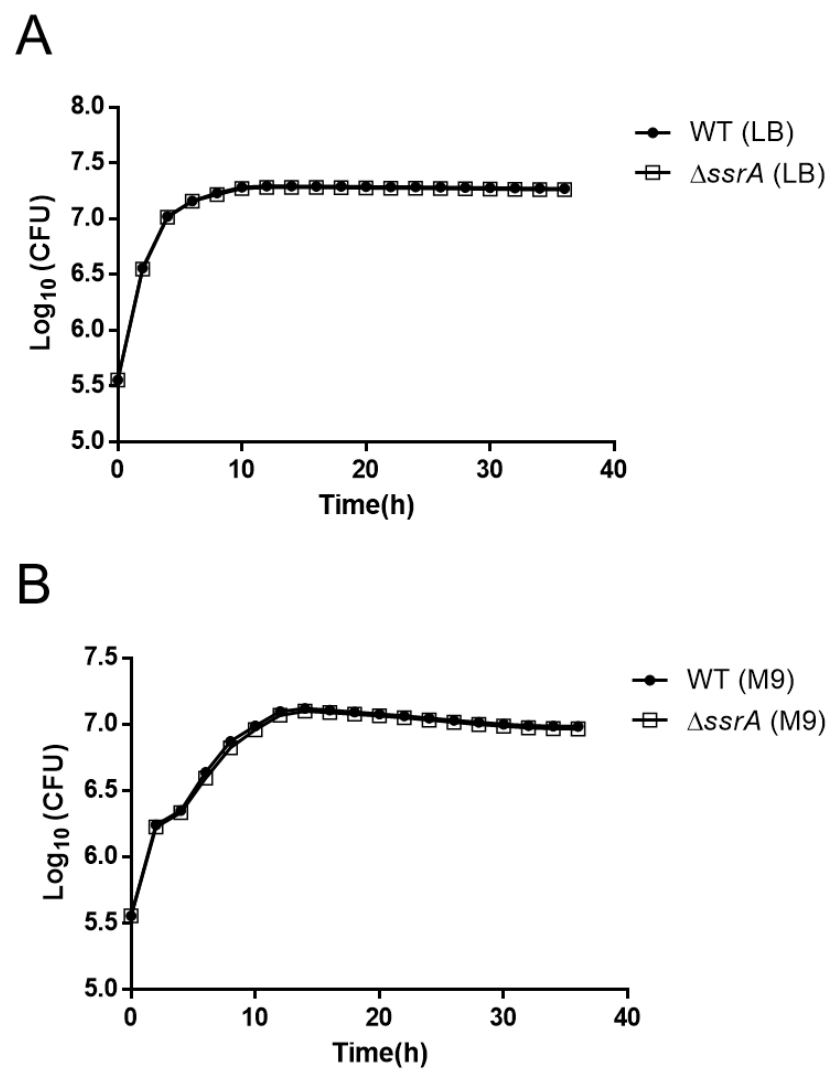

**Figure S1.** (A) and (B) WT and  $\Delta ssrA$  growth curves measured by CFU counts in LB and M9 medium.

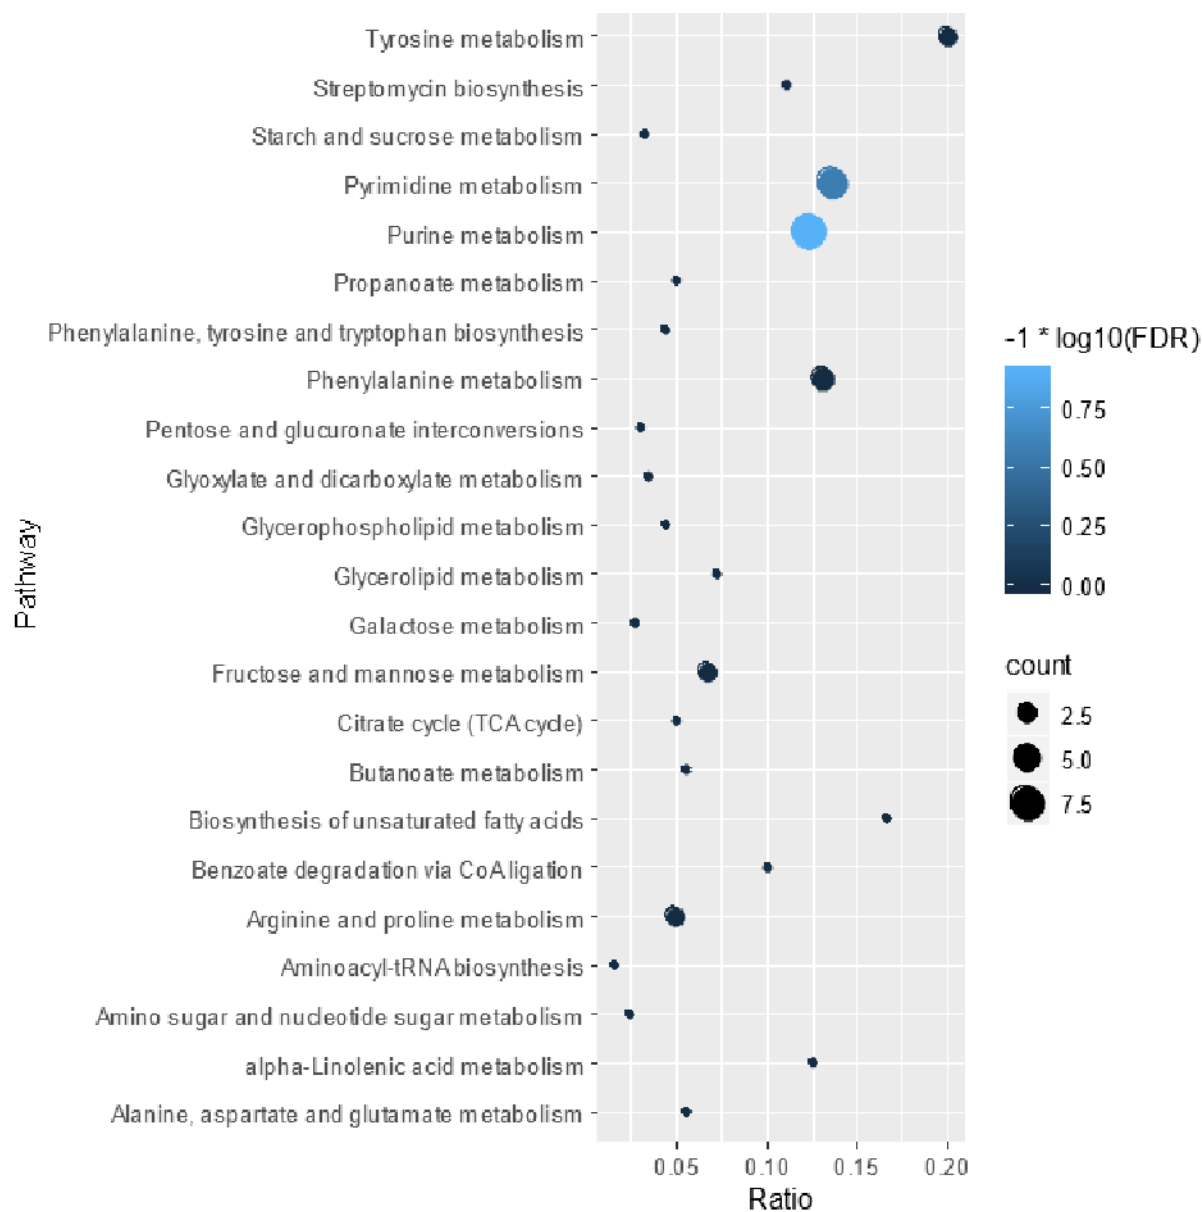

**Figure S2.** Bubble diagram. Pathway analysis of the essential metabolites with significant changes, wherein “FDR” refers to the P-value corrected by multiple hypothesis tests by the false discovery rate (FDR) method, and terms from the pathway with FDR as good or better than 1. “Ratio” refers to the ratio of number of the differential metabolites to the total number of metabolites detected in the pathway.

A

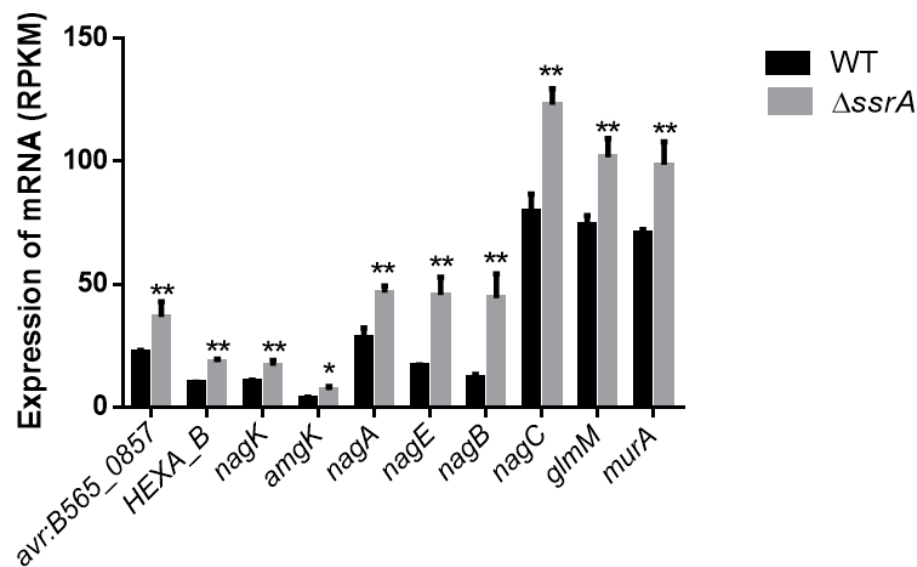

B

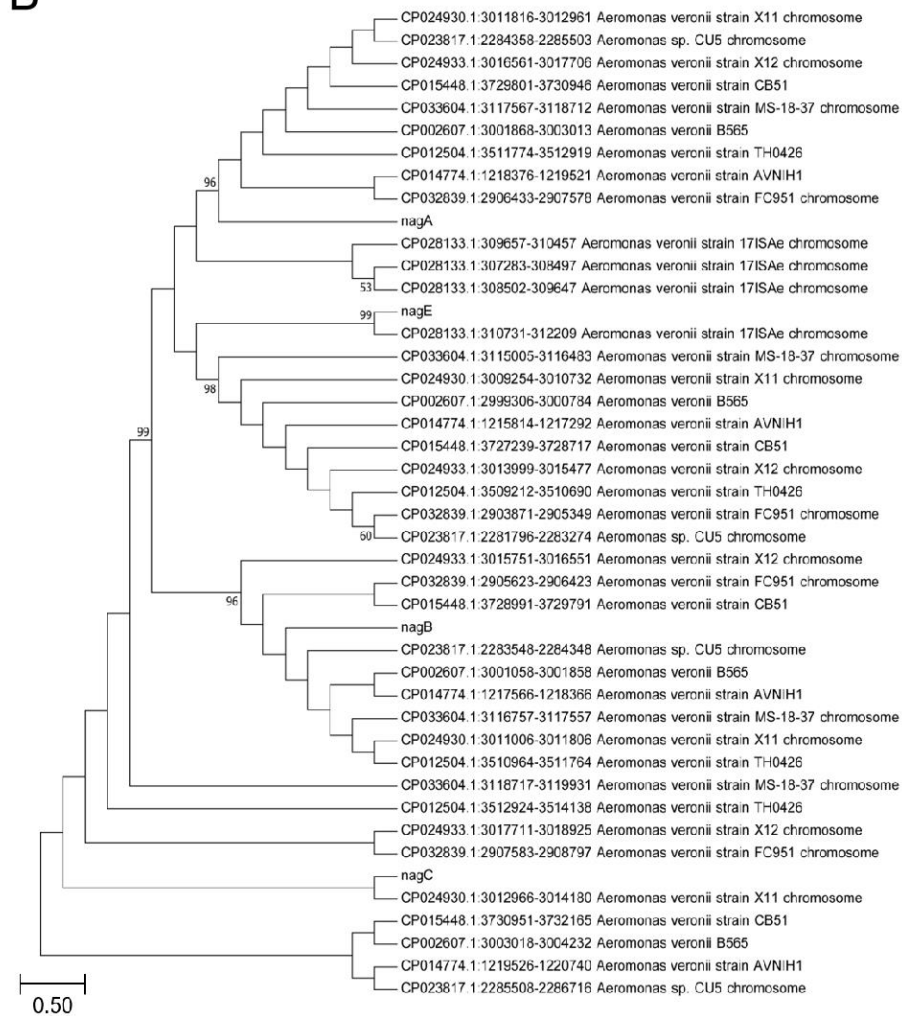

C

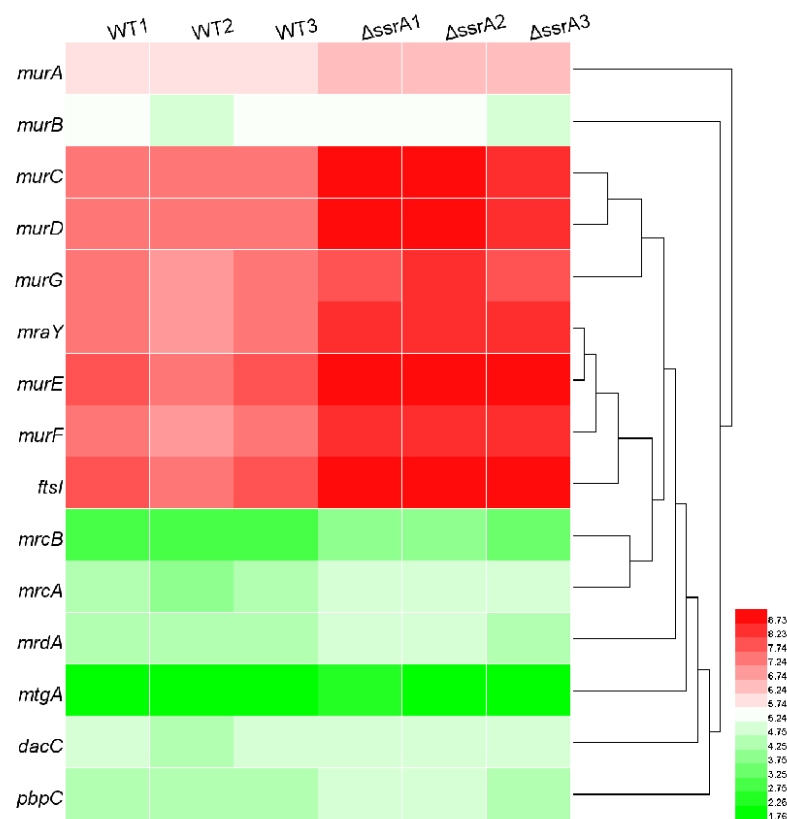

D

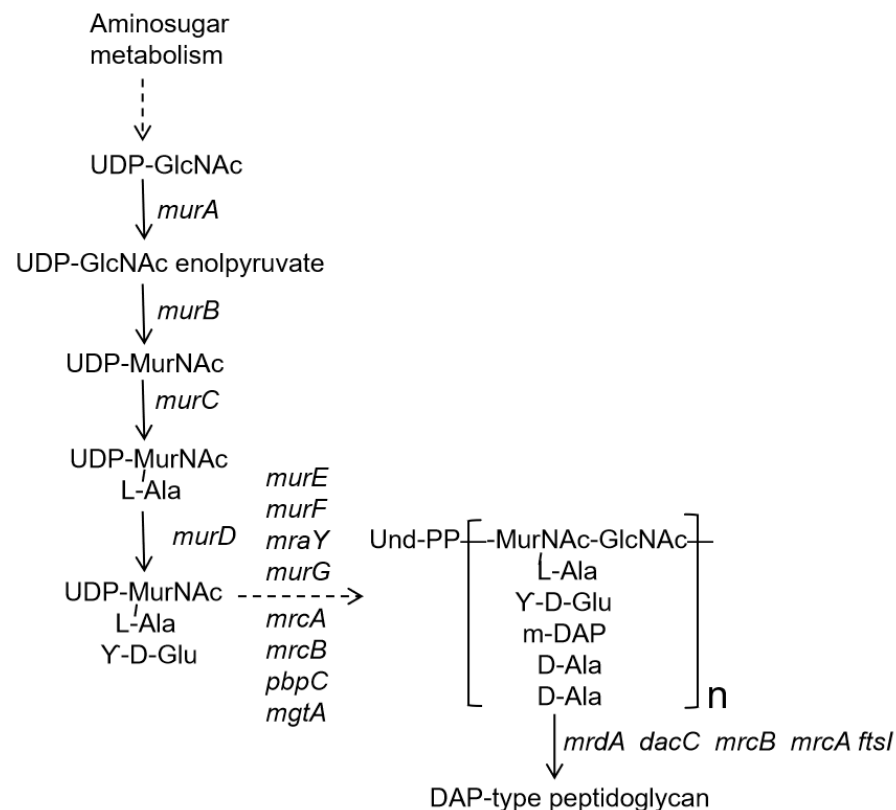

**Figure S3.** (A) The expression levels of the genes associated with the metabolism of GlcNAc in WT and  $\Delta ssrA$  strains, which were revealed in transcriptomic analysis. \* indicates a significant difference with  $p < 0.05$ , and \*\* indicates a greatly significant result with  $p < 0.01$ , followed by one-way ANOVA, Turkey post-test. (B) The phylogenetic tree of *nagA*, *nagB*, *nagC*, *nagE* in the genus *Aeromonas*, wherein the values on the branches indicate the reliability of this branch. (C) Heat map showing the gene expression profiles of peptidoglycan synthesis in WT and  $\Delta ssrA$  strains. (D) Peptidoglycan biosynthesis pathway. Italic font represents a gene, and the arrows indicate the direction of the metabolic flux.

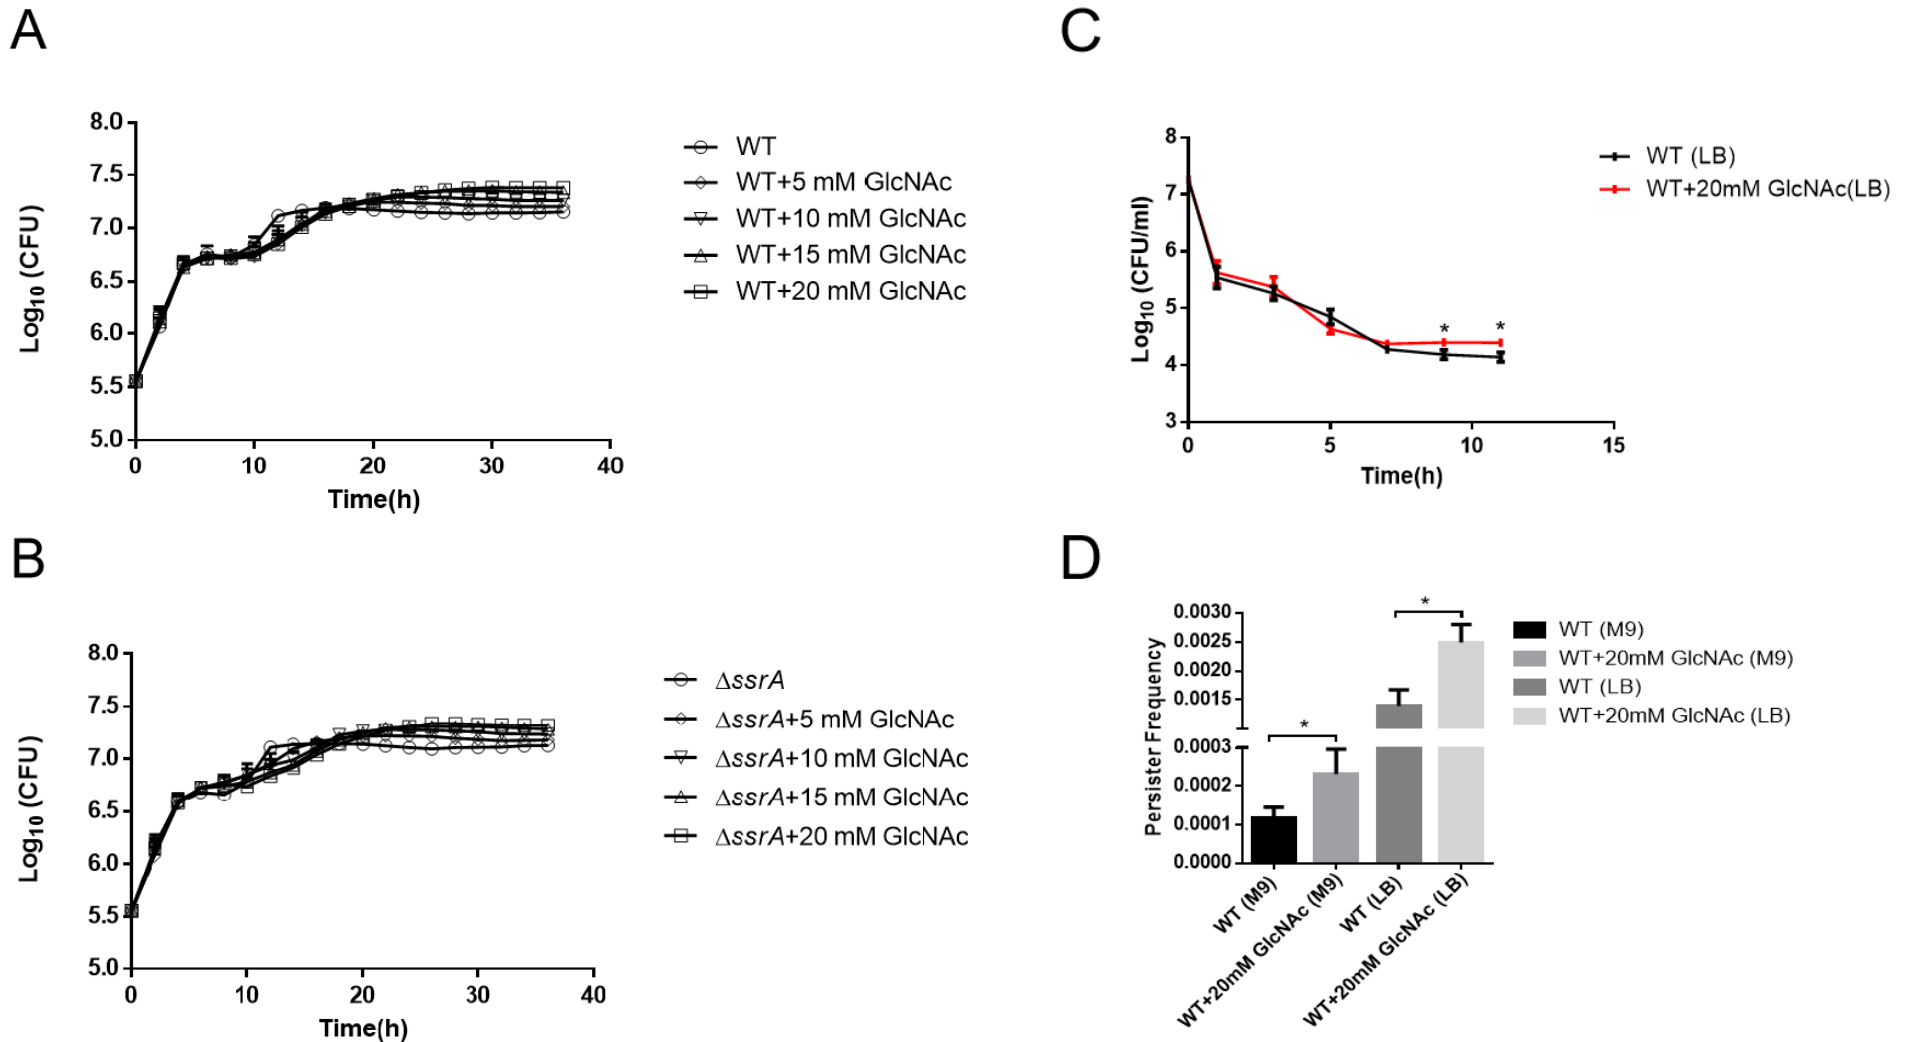

**Figure S4.** (A) and (B) Growth curves measured by CFU counts for WT and  $\Delta ssrA$  strain supplemented without and (WT/ $\Delta ssrA$ ) with 5 mM GlcNAc (5 mM GlcNAc+WT/ $\Delta ssrA$ ), 10 mM GlcNAc (10 mM GlcNAc+WT/ $\Delta ssrA$ ), 15 mM GlcNAc (15 mM GlcNAc+WT/ $\Delta ssrA$ ), and 20mM GlcNAc (20 mM GlcNAc+WT/ $\Delta ssrA$ ) in M9 medium. (C) and (D) Bacterial survival curve and persister frequency showing the persister formations in WT in the absence and presence of 20 mM GlcNAc in LB medium under the treatment with cefotaxime for 11 hours. \* indicates a significant result with  $p < 0.05$ , followed by one-way ANOVA, Turkey post-test.
